# Supplementary material for: Binding of Ru(terpyridine)(pyridine)dipyridophenazine to DNA studied with polarized spectroscopy and calorimetry
Source: Royal Society of Chemistry journal article supplement (doi:10.1039/c4dt02642j), 2014-10-29
Supplement: c4dt02642j1.pdf [file c4dt02642j1.pdf]

## Supplementary Information

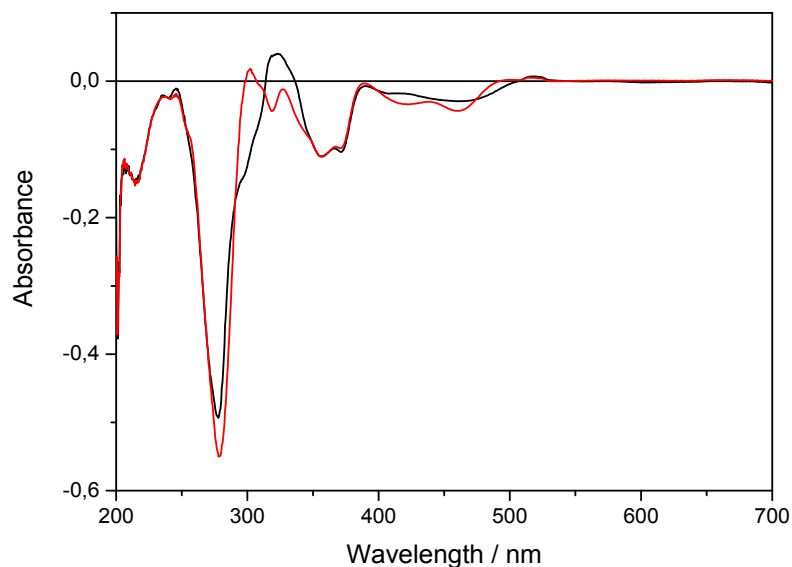

**Fig. S 1** Difference spectrum ( $Ru_{\text{bound}} - (Ru_{\text{free}} + \text{DNA})$ ) of Ru-tpy (black) and  $\Delta Ru$ -bpy (red) in 150 mM NaCl solution at 25°C.

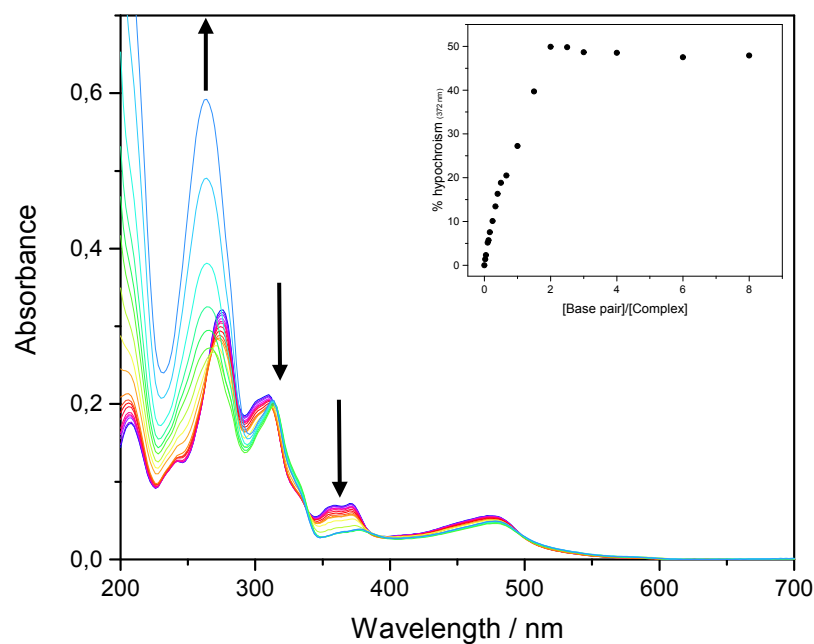

**Fig. S 2** Reverse absorption spectral titration carried out for Ru-tpy (5  $\mu\text{M}$ ) by addition of AT-DNA in a 150 mM NaCl solution at 25°C. The spectra follows the addition of 0-8 [base pairs] / [Ru]. The arrows indicate the course of reaction as increasing amounts of AT-DNA is added to the solution. To avoid dilution equal amounts of 5  $\mu\text{M}$  Ru-tpy was added simultaneously. The increasing hypochromism at 372 nm upon addition of AT-DNA is depicted in the inset of Fig. S 2.

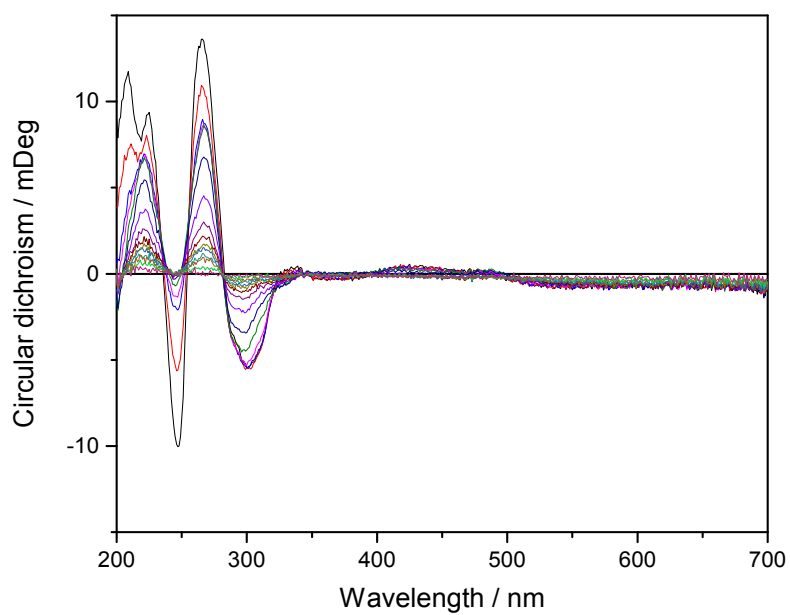

**Fig. S 3** Reverse circular dichroism titration of Ru-tpy (5 μM) with AT-DNA in a 150 mM NaCl aqueous solution. The spectra follows the addition of 0-7 base pairs per complex.

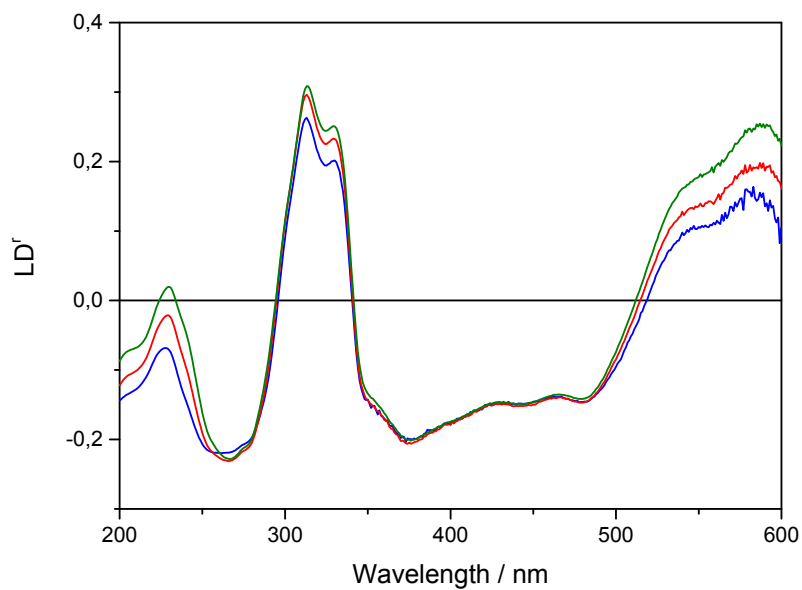

**Fig. S 4** Reduced Linear dichroism spectra of Ru-tpy in the presence of ctDNA in a 150 mM NaCl aqueous solution at [base pairs] / [Ru] ratios of 8 (blue), 4 (red) and 2 (green) in 10 mM NaCl solution. The concentration of ctDNA is 270 μM nucleotides.

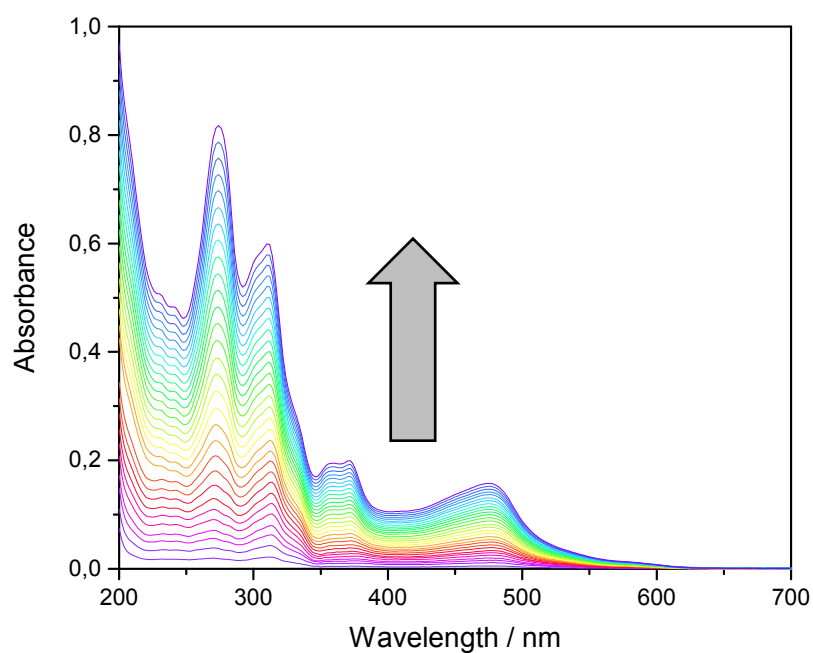

**Fig. S 5** Absorption spectral titration carried out for AT-DNA (12 μM nucleotides) by addition of Ru-tpy in a 150 mM NaCl solution at 25°C. The spectra follows the addition of 0-2 [Ru] / [complex]. The arrow indicate the course of reaction as increasing amounts of Ru-tpy is added to the solution. To avoid dilution equal amounts of 12 μM AT-DNA was added simultaneously.

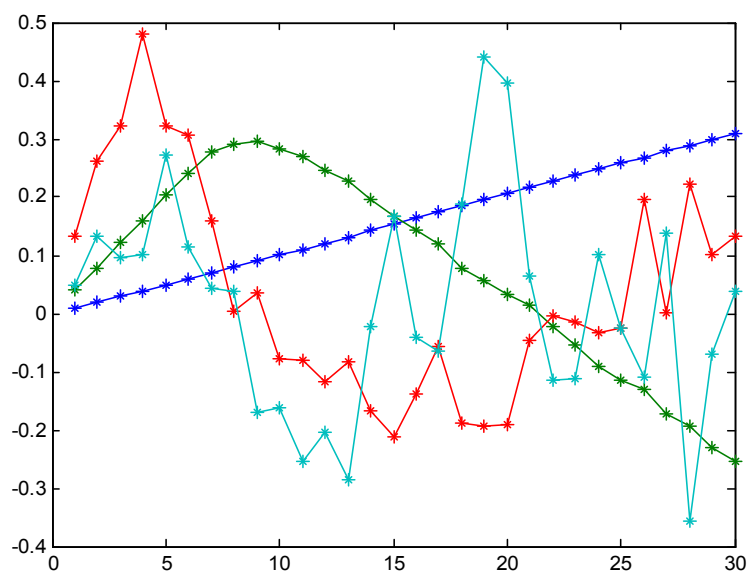

**Fig. S 6** The first 4 columns of V plotted against row number. Blue: v1 (s1=100); green: v2 (s2=2.45); red: v3 (s3=0.23); light blue: v4 (s4=0.18).

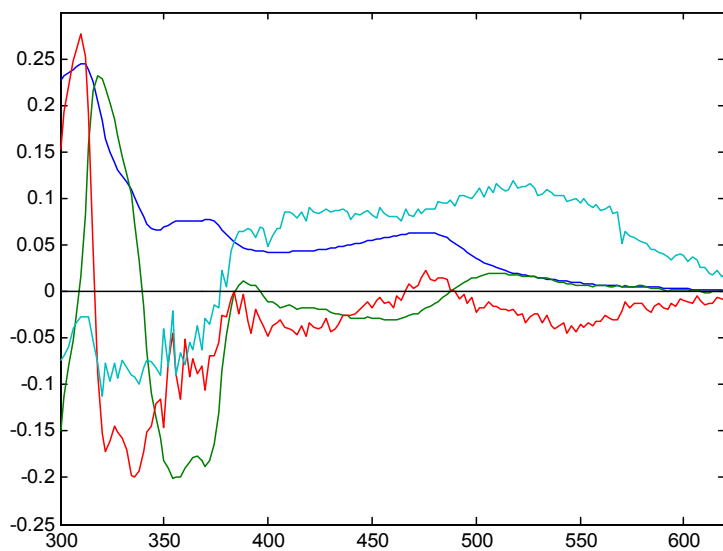

**Fig. S 7** The first 4 columns of U plotted against wavelength. Blue: u1 ( $s_1=100$ ); green: u2 ( $s_2=2.45$ ); red: u3 ( $s_3=0.23$ ); light blue: u4 ( $s_4=0.18$ )

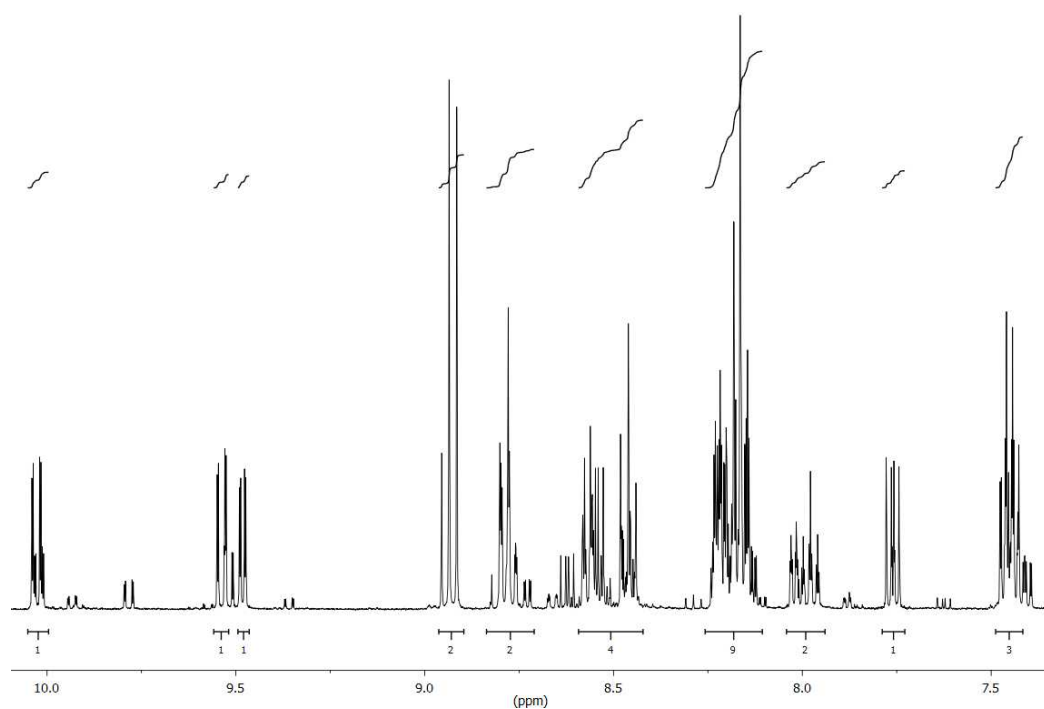

**Fig. S 8**  $^1\text{H}$  NMR spectrum of  $[\text{Ru}(\text{tpy})(\text{py})\text{dppz}](\text{PF}_6)_2$  dissolved in acetone- $d_6$ .
